# Supplementary material for: NOX1 Supports the Metabolic Remodeling of HepG2 Cells
Source: PubMed Central journal article supplement (PMC4373763; doi:10.1371/journal.pone.0122002), 2015-03-25
Supplement: pone.0122002.s002.pdf [file pone.0122002.s002.pdf]

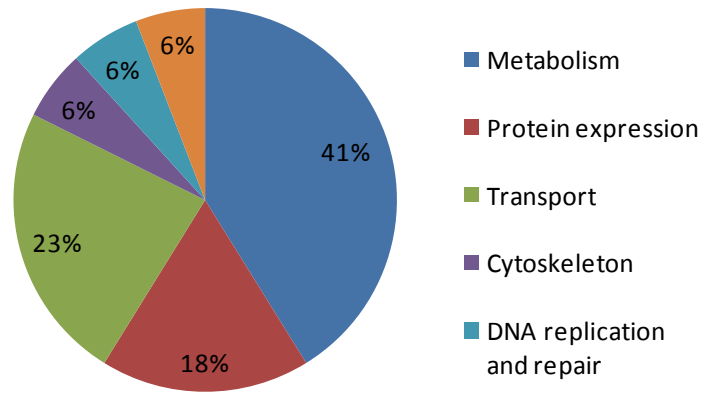

**S1 Figure.** Functional classification of proteins. Proteins dysregulated in shNOX1 HepG2 cells have been classified according to their cellular function.
